# Supplementary material for: Prevalence and Incidence of Multiple Myeloma in Urban Area in China: A National Population-Based Analysis
Source: PubMed Central journal article supplement (PMC6993203; doi:10.3389/fonc.2019.01513), 2020-01-24
Supplement: Data_Sheet_1.pdf [file Data_Sheet_1.pdf]

## Supplementary Material

**eTable 1 Crude prevalence of multiple myeloma in 23 provinces in China during 2012--2016, grouped by gender, age-group, and location. (Units: /100 000 population)**

|           | Male             |                         |                     | Female           |                         |                     |
|-----------|------------------|-------------------------|---------------------|------------------|-------------------------|---------------------|
|           | # of Person-year | # of cases <sup>a</sup> | Prevalence (95% CI) | # of Person-year | # of cases <sup>a</sup> | Prevalence (95% CI) |
| Total     | 6154.2           | 50699                   | 8.24 (8.17-8.31)    | 5610.5           | 34842                   | 6.21 (6.15-6.28)    |
| Age group |                  |                         |                     |                  |                         |                     |
| 0-29      | 2467.54          | 2271                    | 0.92 (0.88-0.96)    | 2174.53          | 1669                    | 0.77 (0.73-0.81)    |
| 30-34     | 528.72           | 1453                    | 2.75 (2.61-2.89)    | 477.23           | 996                     | 2.09 (1.96-2.22)    |
| 35-39     | 463.39           | 950                     | 4.56 (4.37-4.76)    | 432.96           | 1611                    | 3.72 (3.54-3.91)    |
| 40-44     | 531.5            | 3527                    | 6.64 (6.42-6.86)    | 501.91           | 2475                    | 4.93 (4.74-5.13)    |
| 45-49     | 524.04           | 5621                    | 10.73 (10.45-11.01) | 488.02           | 3895                    | 7.98 (7.73-8.24)    |
| 50-54     | 435.9            | 5017                    | 11.51 (11.19-11.83) | 391.16           | 3918                    | 10.02 (9.71-10.33)  |
| 55-59     | 325.88           | 7249                    | 22.25 (21.74-22.76) | 285.43           | 5563                    | 19.49 (18.98-20.01) |
| 60-64     | 299.98           | 7436                    | 24.79 (24.23-25.36) | 276.49           | 4790                    | 17.32 (16.84-17.82) |
| 65-69     | 208.07           | 6145                    | 29.53 (28.80-30.28) | 193.56           | 3918                    | 20.24 (19.61-20.89) |
| 70-74     | 145.57           | 5329                    | 36.61 (35.63-37.60) | 139.86           | 3457                    | 24.72 (23.90-25.56) |
| 75-79     | 110.22           | 3390                    | 30.76 (29.73-31.81) | 112.00           | 1814                    | 16.20 (15.46-16.96) |
| 80-84     | 68.99            | 935                     | 13.55 (12.70-14.45) | 76.71            | 578                     | 7.53 (6.93-8.17)    |
| >=85      | 44.4             | 211                     | 4.75 (4.13-5.44)    | 60.66            | 158                     | 2.61 (2.21-3.04)    |

---

| Area          |         |       |                     |         |       |                  |
|---------------|---------|-------|---------------------|---------|-------|------------------|
| East          | 2601.08 | 26324 | 10.12 (10.00-10.24) | 2397.65 | 17743 | 7.40 (7.29-7.51) |
| North         | 252.28  | 3080  | 12.21 (11.78-12.65) | 247.96  | 2288  | 9.23 (8.85-9.61) |
| North-East    | 671.83  | 5445  | 8.10 (7.89-8.32)    | 663.43  | 3821  | 5.76 (5.58-5.95) |
| North-West    | 236.85  | 1286  | 5.43 (5.14-5.73)    | 215.28  | 934   | 4.34 (4.06-4.63) |
| South-Central | 1608.53 | 9863  | 6.13 (6.01-6.25)    | 1369.5  | 6875  | 5.02 (4.90-5.14) |
| South-West    | 783.63  | 4701  | 6.00 (5.83-6.17)    | 716.68  | 3182  | 4.44 (4.29-4.60) |

---

<sup>a</sup> Including all observed cases and predicted number of cases in people missing diagnostic information.

**eTable 2 Prevalence and incidence of multiple myeloma in different regions of China during 2012-2016.**

| Groups            | Prevalence (per 100 000 population) |                        |                     | Incidence (per 100 000 person-years) |                                 |                  |
|-------------------|-------------------------------------|------------------------|---------------------|--------------------------------------|---------------------------------|------------------|
|                   | # of 10 <sup>5</sup> population     | # of Case <sup>a</sup> | Rate (95%CI)        | # of 10 <sup>5</sup> person-years    | # of incident Case <sup>a</sup> | Rate (95%CI)     |
| East <sup>b</sup> | 4998.73                             | 44067                  | 8.82 (8.73-8.90)    | 1450.05                              | 2573                            | 1.77 (1.71-1.84) |
| North             | 500.24                              | 5368                   | 10.73 (10.45-11.02) | 162.57                               | 151                             | 0.93 (0.79-1.09) |
| North-East        | 1335.26                             | 9265                   | 6.94 (6.80-7.08)    | 149.11                               | 263                             | 1.76 (1.56-1.99) |
| North-West        | 452.13                              | 2219                   | 4.91 (4.71-5.12)    | 145.06                               | 171                             | 1.18 (1.01-1.37) |
| South-Central     | 2978.04                             | 16738                  | 5.62 (5.54-5.71)    | 779.18                               | 1145                            | 1.47 (1.39-1.56) |
| South-West        | 1500.31                             | 7883                   | 5.25 (5.14-5.37)    | 425.35                               | 297                             | 0.70 (0.62-0.78) |

<sup>a</sup> Including all observed case and predicted number of cases in people missing diagnostic information.

<sup>b</sup> Area was defined as in Table 1.

**eTable 3 Crude prevalence and incidence of multiple myeloma in China during 2012-2016, grouped by provinces (Units: /100 000 population for prevalence; /100 000 person-years for incidence)**

| Groups                | Prevalence                      |           |                     | Incidence                         |                    |                  |
|-----------------------|---------------------------------|-----------|---------------------|-----------------------------------|--------------------|------------------|
|                       | # of 10 <sup>5</sup> population | # of Case | Rate (95%CI)        | # of 10 <sup>5</sup> person-years | # of incident Case | Rate (95%CI)     |
| Shanxi                | 214.22                          | 3864      | 18.04 (17.47-18.62) | 69.45                             | 49                 | 0.70 (0.52-0.93) |
| Inner Mongolia        | 286.01                          | 1503      | 5.26 (4.99-5.53)    | 93.11                             | 102                | 1.10 (0.89-1.33) |
| Liaoning <sup>a</sup> | 852.17                          | 7367      | 8.65 (8.45-8.84)    | -                                 | -                  | -                |
| Jilin                 | 373.63                          | 1318      | 3.53 (3.34-3.72)    | 86.88                             | 67                 | 0.77 (0.60-0.98) |
| Heilongjiang          | 109.46                          | 580       | 5.30 (4.88-5.75)    | 62.25                             | 196                | 3.15 (2.72-3.62) |
| Jiangsu               | 1338.82                         | 12590     | 9.40 (9.24-9.57)    | 298.49                            | 377                | 1.26 (1.14-1.40) |
| Zhejiang              | 832.67                          | 10087     | 12.11 (11.88-12.35) | 244.83                            | 368                | 1.50 (1.35-1.66) |
| Anhui                 | 335.78                          | 3408      | 10.15 (9.81-10.50)  | 83.54                             | 167                | 2.00 (1.71-2.33) |
| Jiangxi               | 349.02                          | 2945      | 8.44 (8.14-8.75)    | 85.82                             | 272                | 3.17 (2.80-3.57) |
| Shandong              | 2142.45                         | 15037     | 7.02 (6.91-7.13)    | 737.37                            | 1388               | 1.88 (1.78-1.98) |
| Henan                 | 308.77                          | 1976      | 6.40 (6.12-6.69)    | 111.49                            | 360                | 3.23 (2.90-3.58) |
| Hubei                 | 335.92                          | 4529      | 13.48 (13.09-13.88) | 119.18                            | 365                | 3.06 (2.76-3.39) |
| Hunan                 | 435.5                           | 2082      | 4.78 (4.58-4.99)    | 113.81                            | 145                | 1.27 (1.08-1.50) |
| Guangdong             | 1686.63                         | 7489      | 4.44 (4.34-4.54)    | 434.72                            | 275                | 0.63 (0.56-0.71) |
| Guangxi <sup>a</sup>  | 89.9                            | 480       | 5.34 (4.87-5.84)    | -                                 | -                  | -                |

| Groups               | Prevalence                      |           |                  | Incidence                         |                    |                  |
|----------------------|---------------------------------|-----------|------------------|-----------------------------------|--------------------|------------------|
|                      | # of 10 <sup>5</sup> population | # of Case | Rate (95%CI)     | # of 10 <sup>5</sup> person-years | # of incident Case | Rate (95%CI)     |
| Hainan <sup>a</sup>  | 121.33                          | 181       | 1.49 (1.28-1.73) | -                                 | -                  | -                |
| Chongqing            | 997.23                          | 4983      | 5.00 (4.86-5.14) | 318.74                            | 233                | 0.73 (0.64-0.83) |
| Guizhou <sup>a</sup> | 65.94                           | 202       | 3.06 (2.66-3.52) | -                                 | -                  | -                |
| Yunnan               | 437.14                          | 2699      | 6.17 (5.94-6.41) | 106.62                            | 64                 | 0.60 (0.46-0.77) |
| Shaanxi              | 208.89                          | 1113      | 5.33 (5.02-5.65) | 74.34                             | 48                 | 0.65 (0.48-0.86) |
| Gansu <sup>a</sup>   | 36.25                           | 217       | 5.99 (5.22-6.84) | -                                 | -                  | -                |
| Qinghai              | 64.78                           | 306       | 4.72 (4.21-5.28) | 16.62                             | 30                 | 1.79 (1.22-2.58) |
| Xinjiang             | 142.2                           | 583       | 4.10 (3.77-4.45) | 54.11                             | 93                 | 1.72 (1.39-2.11) |
| Total                | 11764.7                         | 85540     | 7.27 (7.22-7.32) | 3111.34                           | 4600               | 1.48 (1.44-1.52) |

<sup>a</sup> Five provinces (Liaoning, Guangxi, Hainan, Guizhou, and Gansu) were excluded due to the time ranges <5 years.

**eTable 4 Crude incidence of multiple myeloma in 18 provinces in China in 2016, grouped by gender, age-group, and location (Units: /100 000 person-years)**

|           | Male             |                |                    | Female           |                |                    |
|-----------|------------------|----------------|--------------------|------------------|----------------|--------------------|
|           | # of Person-year | # of new cases | Incidence (95% CI) | # of Person-year | # of new cases | Incidence (95% CI) |
| Total     | 1616.96          | 2741           | 1.70 (1.63-1.76)   | 1494.37          | 1859           | 1.24 (1.19-1.30)   |
| Age group |                  |                |                    |                  |                |                    |
| 0-29      | 636.98           | 166            | 0.26 (0.22-0.30)   | 560.79           | 60             | 0.11 (0.08-1.38)   |
| 30-34     | 139.05           | 78             | 0.56 (0.44-0.70)   | 126.89           | 52             | 0.41 (0.31-0.54)   |
| 35-39     | 114.82           | 114            | 0.99 (0.82-1.19)   | 108.21           | 122            | 1.12 (0.94-1.35)   |
| 40-44     | 130.28           | 191            | 1.47 (1.27-1.69)   | 124.54           | 180            | 1.44 (1.24-1.67)   |
| 45-49     | 142.04           | 349            | 2.46 (2.21-2.73)   | 134.63           | 189            | 1.41 (1.21-1.62)   |
| 50-54     | 130.31           | 330            | 2.53 (2.27-2.82)   | 118.59           | 239            | 2.01 (1.77-2.29)   |
| 55-59     | 75.46            | 402            | 5.33 (4.82-5.87)   | 68.12            | 376            | 5.53 (4.98-6.11)   |
| 60-64     | 84.09            | 464            | 5.52 (5.03-6.04)   | 80.14            | 281            | 3.50 (3.11-3.94)   |
| 65-69     | 60.7             | 298            | 4.91 (4.37-5.50)   | 58.91            | 183            | 3.11 (2.67-3.59)   |
| 70-74     | 40.6             | 220            | 5.43 (4.73-6.18)   | 40.22            | 115            | 2.86 (2.36-3.43)   |

|                   |        |      |                  |        |      |                  |
|-------------------|--------|------|------------------|--------|------|------------------|
| 75-79             | 29.84  | 95   | 3.20 (2.58-3.89) | 31.05  | 47   | 1.52 (1.11-2.01) |
| 80-84             | 19.5   | 26   | 1.34 (0.87-1.95) | 22.95  | 14   | 0.61 (0.33-1.02) |
| >=85              | 13.29  | 7    | 0.50 (0.21-1.09) | 19.35  | 1    | 0.05 (0.01-0.29) |
| Area <sup>a</sup> |        |      |                  |        |      |                  |
| East              | 748.36 | 1524 | 2.04 (1.94-2.14) | 701.69 | 1049 | 1.49 (1.41-1.59) |
| North             | 82.91  | 95   | 1.15 (0.93-1.40) | 79.65  | 56   | 0.70 (0.53-0.91) |
| North-East        | 72.84  | 144  | 1.98 (1.67-2.33) | 76.27  | 119  | 1.56 (1.29-1.87) |
| North-West        | 74.84  | 117  | 1.56 (1.29-1.87) | 70.22  | 54   | 0.77 (0.58-1.00) |
| South-Central     | 418.71 | 675  | 1.61 (1.49-1.74) | 360.47 | 471  | 1.31 (1.19-1.43) |
| South-West        | 219.29 | 186  | 0.85 (0.73-0.98) | 206.07 | 111  | 0.54 (0.44-0.65) |

<sup>a</sup> Area was defined as in Table 1.

**eTable 5 Sensitivity analysis results for prevalence and incidence (Units: /100 000 population for prevalence; /100 000 person-years for incidence)**

|                   | <b>Including all suspected MM cases</b> | <b>Using only observed cases<sup>a</sup></b> | <b>Using the observed number of MM cases in each province as weights</b> | <b>Excluding the top 10% of the provinces along the absence of the diagnosis<sup>b</sup></b> |
|-------------------|-----------------------------------------|----------------------------------------------|--------------------------------------------------------------------------|----------------------------------------------------------------------------------------------|
| <b>Prevalence</b> |                                         |                                              |                                                                          |                                                                                              |
| Overall           | 6.95 (5.81-8.08)                        | 3.47 (2.73-4.20)                             | 8.29 (8.22-8.36)                                                         | 7.00 (5.71-8.29)                                                                             |
| Male              | 7.97 (6.58-9.35)                        | 3.96 (3.16-4.76)                             | 9.25 (9.15-9.34)                                                         | 8.05 (6.52-9.58)                                                                             |
| Female            | 5.85 (4.90-6.79)                        | 2.94 (2.25-3.63)                             | 7.33 (7.24-7.43)                                                         | 5.89 (4.79-6.98)                                                                             |
| <b>Incidence</b>  |                                         |                                              |                                                                          |                                                                                              |
| Overall           | 1.62 (1.29-1.94)                        | 0.85 (0.70-0.99)                             | 1.68 (1.62-1.73)                                                         | 1.57 (1.25-1.90)                                                                             |
| Male              | 1.86 (1.49-2.22)                        | 0.95 (0.79-1.11)                             | 1.86 (1.78-1.94)                                                         | 1.78 (1.42-2.14)                                                                             |
| Female            | 1.31 (1.02-1.61)                        | 0.69 (0.55-0.83)                             | 1.52 (1.44-1.60)                                                         | 1.30 (1.00-1.60)                                                                             |

<sup>a</sup> Known to be an underestimation of rates.

<sup>b</sup> Shandong and Xinjiang were excluded.
